# Supplementary material for: On mechanism of antioxidant effect of fullerenols
Source: PubMed Central journal article supplement — Biochem Biophys Rep. 2016 Nov 9;9:1–8. doi: 10.1016/j.bbrep.2016.10.011 (PMC5614482; doi:10.1016/j.bbrep.2016.10.011), 2016-11-09
Supplement: mmc2.pdf [file mmc2.pdf]

To view the full contents of this document, you need a later version of the PDF viewer. You can upgrade to the latest version of Adobe Reader from [www.adobe.com/products/acrobat/readstep2.html](http://www.adobe.com/products/acrobat/readstep2.html)

For further support, go to [www.adobe.com/support/products/acrreader.html](http://www.adobe.com/support/products/acrreader.html)
